# Supplementary material for: Organosilanes as synthetic precursors for oligosiloxanes and phenylsilica spheres
Source: Royal Society of Chemistry journal article supplement (doi:10.1039/d4nj00543k), 2024-01-01
Supplement: d4nj00543k1.pdf [file d4nj00543k1.pdf]

## SUPPORTING INFORMATION

### **Organosilanes as synthetic precursors for oligosiloxanes and phenylsilica spheres**

**Ragini Jain and Ravi Shankar\***

Department of Chemistry, Indian Institute of Technology Delhi, Hauz Khas, New Delhi-110016

\*Corresponding author e-mail: shankar@chemistry.iitd.ac.in

## Index

|                                                                                                                                                       | Page No. |
|-------------------------------------------------------------------------------------------------------------------------------------------------------|----------|
| <b>Fig S1.</b> $^1\text{H}$ NMR spectrum of cyclic siloxane.....                                                                                      | 3        |
| <b>Fig S2.</b> $^{29}\text{Si}\{^1\text{H}\}$ NMR spectrum of cyclic siloxane.....                                                                    | 3        |
| <b>Fig S3.</b> ESI-MS spectrum of cyclic siloxane.....                                                                                                | 4        |
| <b>Fig S4.</b> DLS profile of 0.01 wt% aqueous dispersion of cyclic siloxane.....                                                                     | 4        |
| <b>Fig S5.</b> GC MS and $^{29}\text{Si}\{^1\text{H}\}$ NMR of linear siloxane, <b>1b</b> .....                                                       | 4        |
| <b>Fig S6.</b> Various stages of water-organosilane emulsification.....                                                                               | 5        |
| <b>Fig S7.</b> $^1\text{H}$ NMR monitoring of hydrolytic oxidation of $\text{MePhSiH}_2$ and <i>Mecyclo</i> - $\text{HexSiH}_2$ ....                  | 5        |
| <b>Fig S8.</b> ESI-MS of disiloxane-1,3-diols, <b>2a</b> and <b>2b</b> .....                                                                          | 5        |
| <b>Fig S9.</b> $^1\text{H}$ NMR spectrum of <b>2d</b> .....                                                                                           | 6        |
| <b>Fig. S10.</b> ESI MS of mixture of 1,3- and 1,5-siloxanols, <b>2c</b> .....                                                                        | 6        |
| <b>Fig. S11.</b> ESI MS of mixture of 1,3- and 1,5-siloxanols, <b>2d</b> .....                                                                        | 6        |
| <b>Fig S12.</b> $^1\text{H}$ and $^{29}\text{Si}\{^1\text{H}\}$ NMR spectra of <i>t</i> - $\text{Bu}_2\text{Si}(\text{H})\text{OH}$ , <b>2e</b> ..... | 7        |
| <b>Fig S13.</b> $^1\text{H}$ and $^{29}\text{Si}\{^1\text{H}\}$ NMR spectra of $\text{Ph}_2\text{Si}(\text{OH})_2$ , <b>2f</b> .....                  | 7        |
| <b>Fig S14.</b> $^{29}\text{Si}\{^1\text{H}\}$ NMR and GC MS of linear siloxane, <b>3</b> .....                                                       | 7        |
| <b>Fig S15.</b> $^{29}\text{Si}\{^1\text{H}\}$ NMR and ESI MS of oligoether-substituted linear siloxane, <b>4a</b> .....                              | 8        |
| <b>Fig S16.</b> $^{29}\text{Si}\{^1\text{H}\}$ NMR and ESI MS of triethoxysilyl-substituted linear siloxane, <b>4b</b> .....                          | 8        |
| <b>Fig S17.</b> FT-IR spectrum of <b>5a</b> .....                                                                                                     | 8        |
| <b>Fig S18.</b> FT-IR spectrum of <b>5b</b> .....                                                                                                     | 9        |
| <b>Fig S19.</b> Solid state $^{29}\text{Si}$ NMR spectrum of <b>5a</b> .....                                                                          | 9        |
| <b>Fig S20.</b> UV-Vis diffuse reflectance spectrum of <b>5a</b> .....                                                                                | 9        |
| <b>Fig S21.</b> Powder X-Ray diffraction pattern of <b>5a</b> and <b>5b</b> .....                                                                     | 10       |

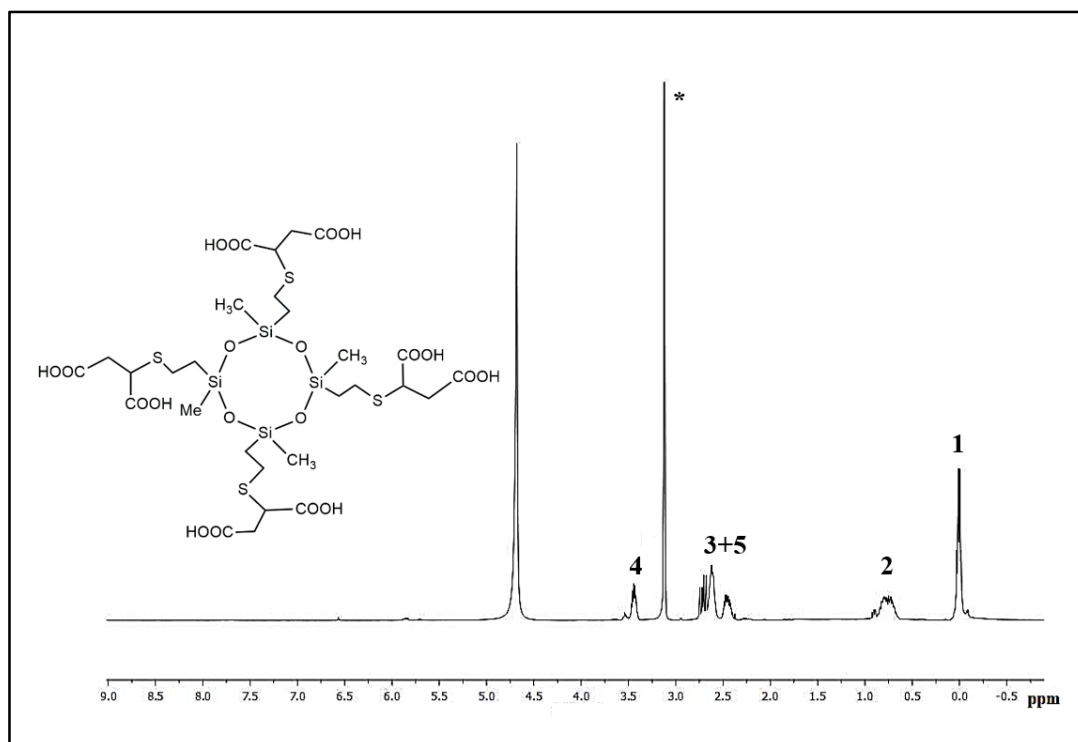

**Figure S1.**  $^1\text{H}$  NMR spectrum of cyclic siloxane

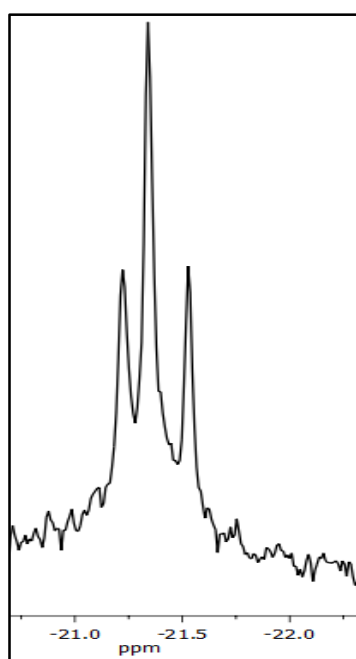

**Figure S2.**  $^{29}\text{Si}\{^1\text{H}\}$  NMR spectrum of cyclic siloxane

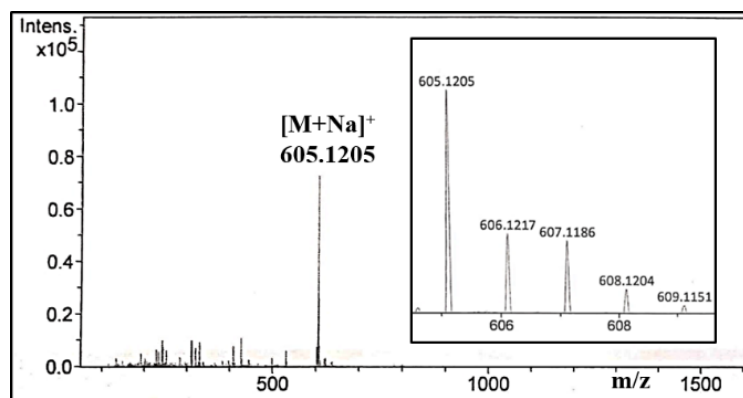

Figure S3. ESI-MS spectrum of cyclic siloxane

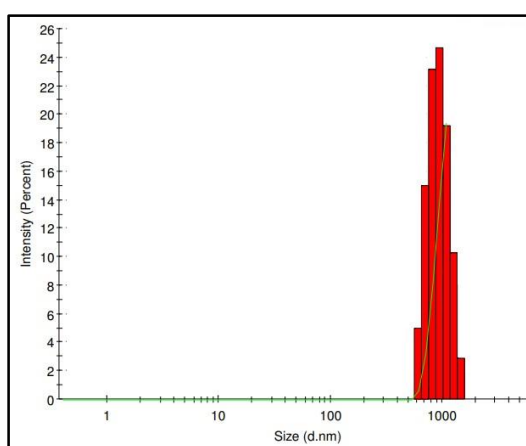

Figure S4. DLS profile of 0.01 wt% aqueous dispersion

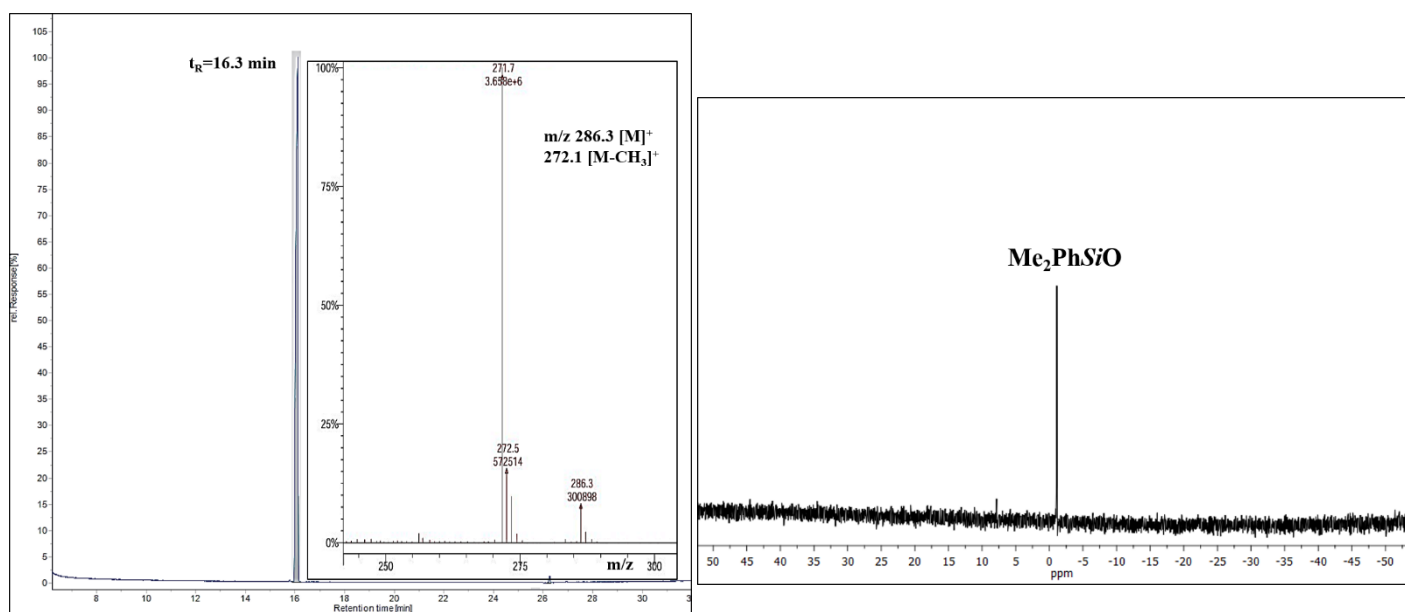

Figure S5. GC MS and  $^{29}\text{Si}\{^1\text{H}\}$  NMR of linear siloxane, **1b**

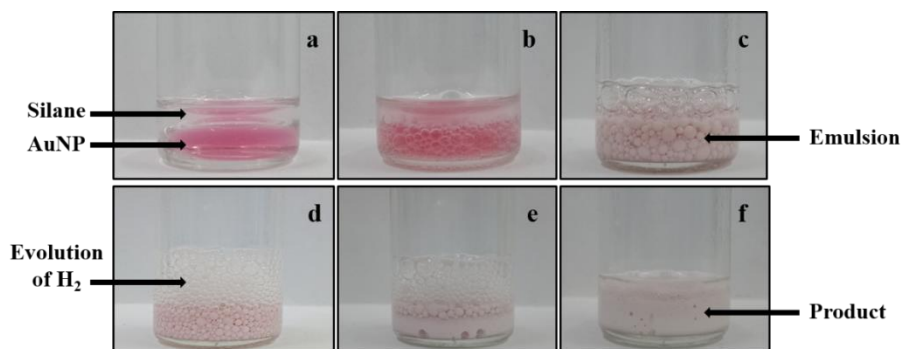

**Figure S6.** Visuals showing (a) **AuNP** in water with methylphenylsilane as an immiscible phase. (b–e) Various stages of emulsification followed by (f) Destabilization of the Pickering catalyst.

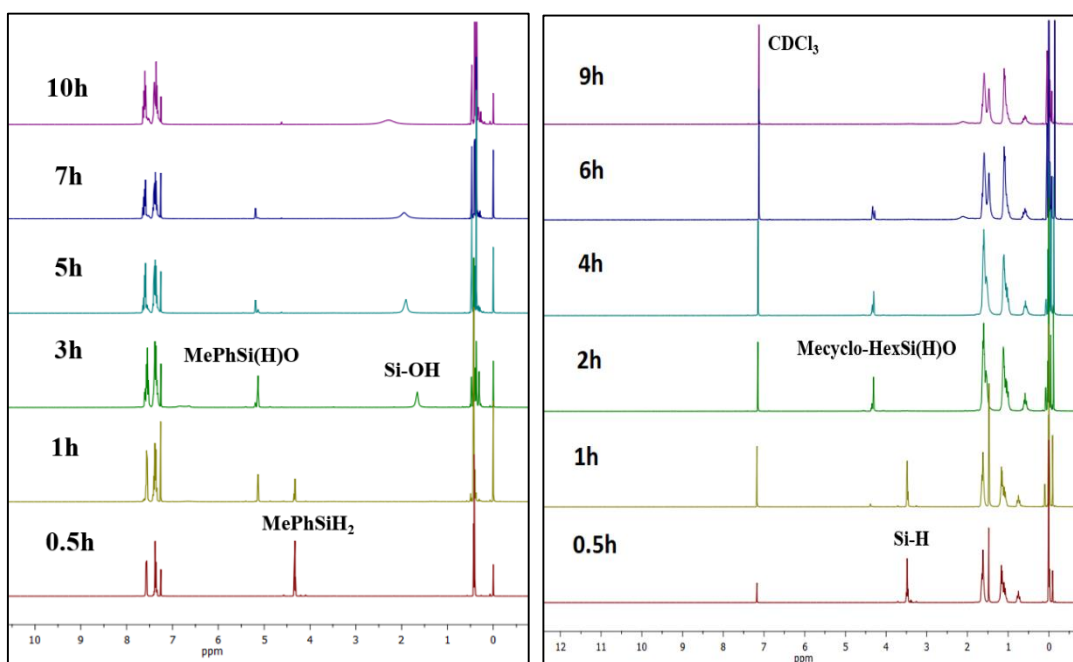

**Figure S7.**  $^1\text{H}$  NMR monitoring of hydrolytic oxidation of  $\text{MePhSiH}_2$  (left) and *Mecyclo*- $\text{HexSiH}_2$  (right)

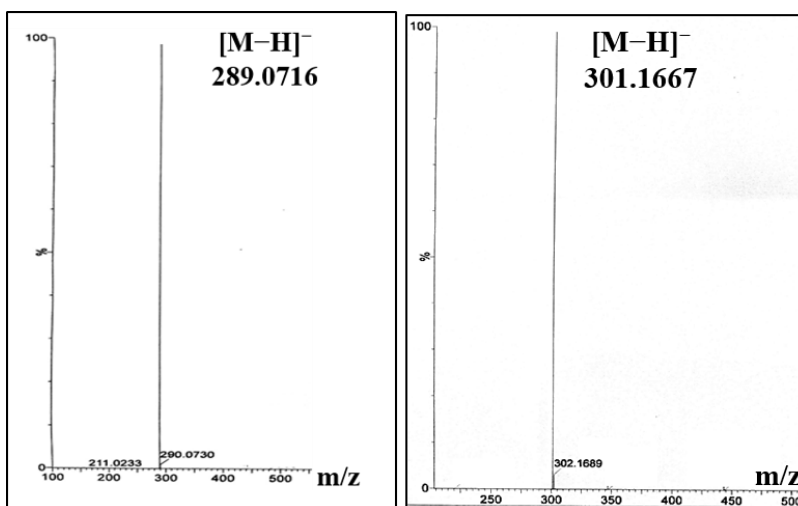

**Figure S8.** ESI-MS of disiloxane-1,3-diols **2a** (left) and **2b** (right)

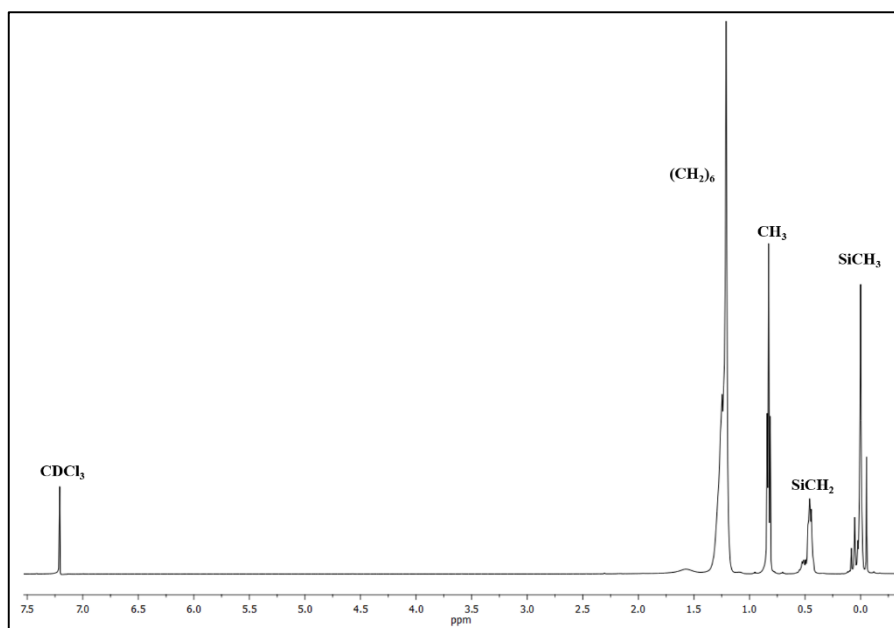

Figure S9.  $^1\text{H}$  NMR spectrum of **2d**

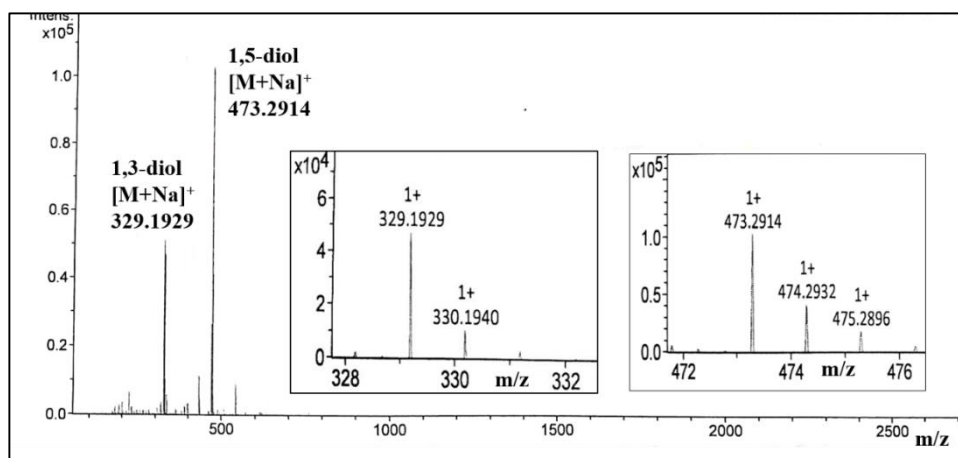

Figure S10. ESI MS of mixture of 1,3- and 1,5-siloxanols, **2c**

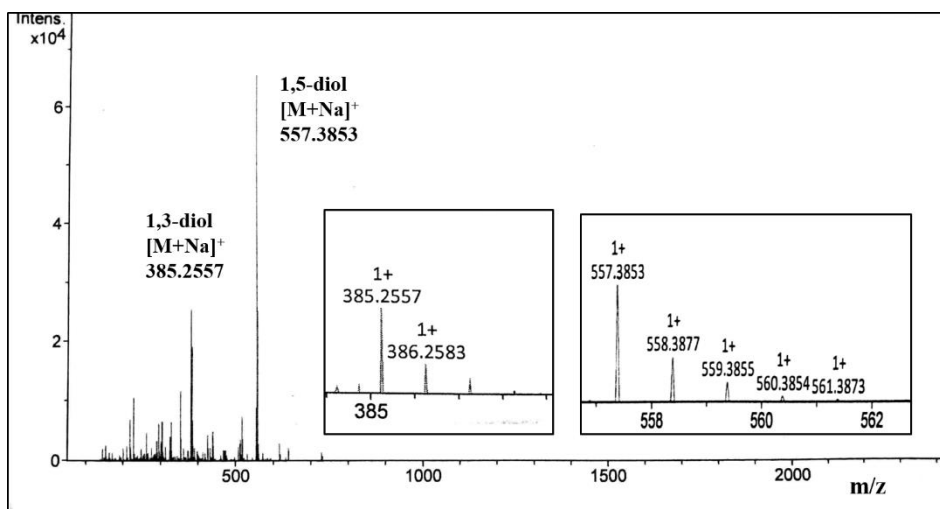

Figure S11. ESI MS of mixture of 1,3- and 1,5-siloxanols, **2d**

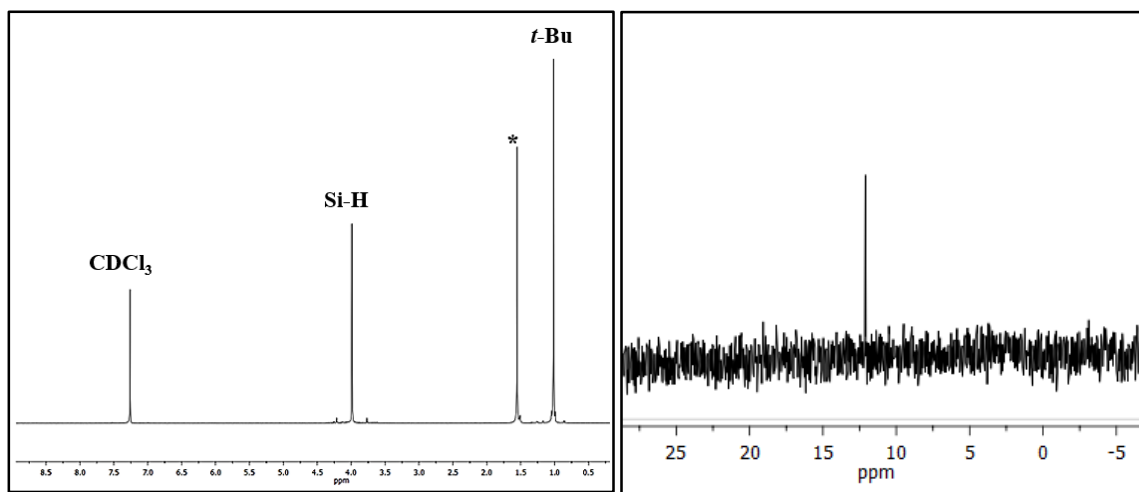

Figure S12.  $^1\text{H}$  and  $^{29}\text{Si}\{^1\text{H}\}$  NMR spectra of  $t\text{-Bu}_2\text{Si}(\text{H})\text{OH}$ , **2e**

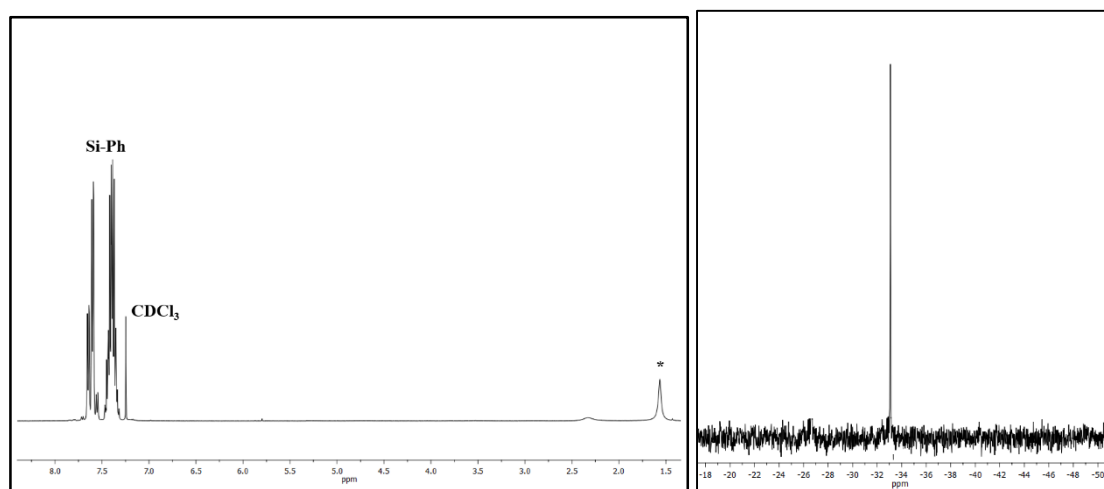

Figure S13.  $^1\text{H}$  and  $^{29}\text{Si}\{^1\text{H}\}$  NMR spectra of  $\text{Ph}_2\text{Si}(\text{OH})_2$ , **2f**

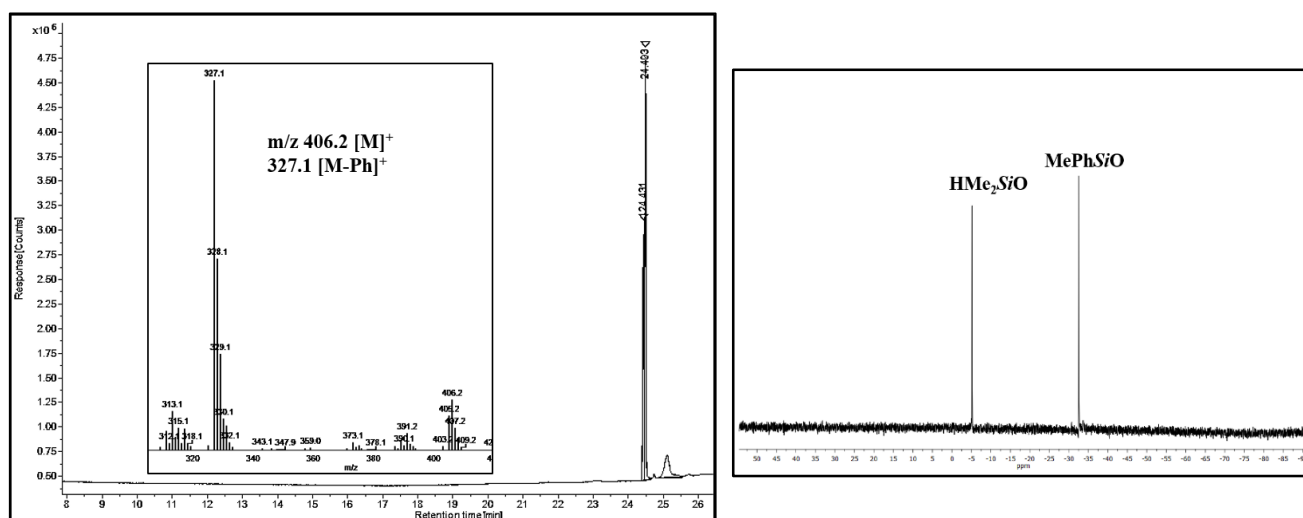

Figure S14.  $^{29}\text{Si}\{^1\text{H}\}$  NMR and GC MS of linear siloxane, **3**

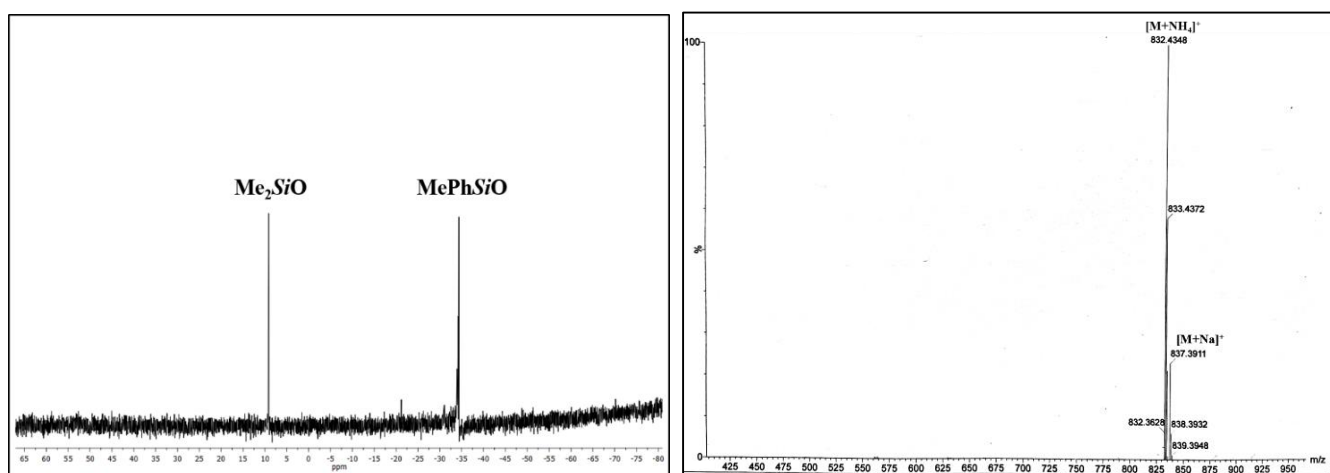

**Figure S15.**  $^{29}\text{Si}\{^1\text{H}\}$  NMR and ESI MS of oligoether-substituted linear siloxane, **4a**

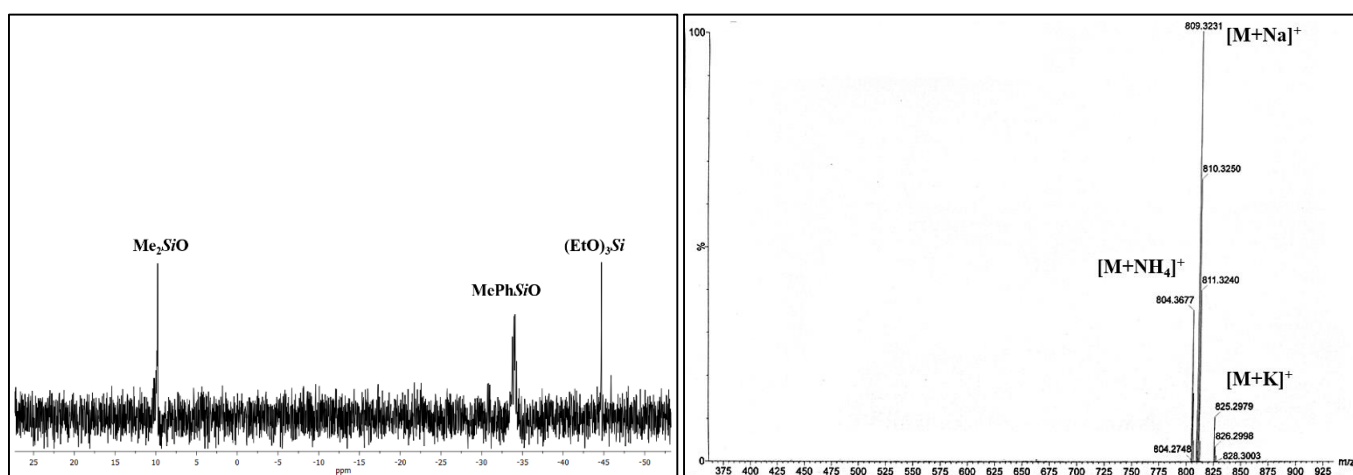

**Figure S16.**  $^{29}\text{Si}\{^1\text{H}\}$  NMR and ESI MS of triethoxysilyl-substituted linear siloxane, **4b**

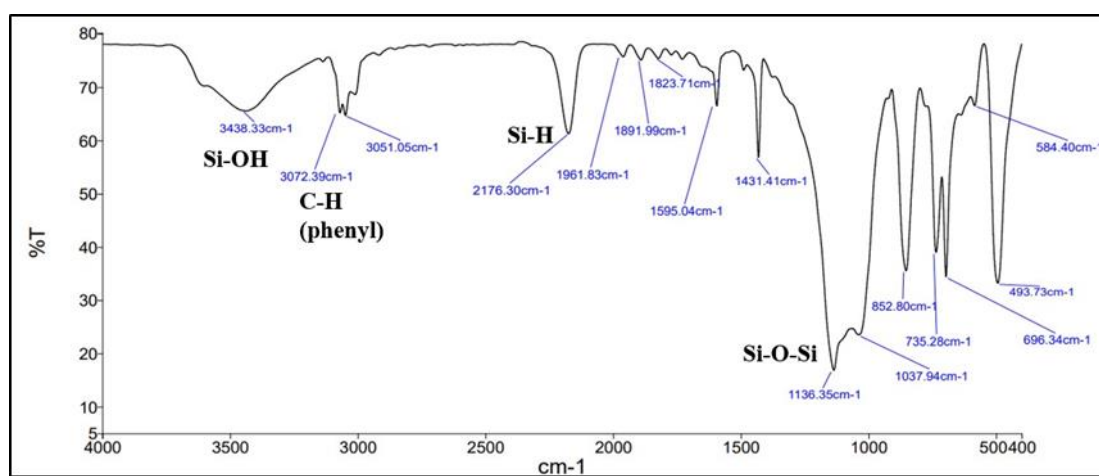

**Figure S17.** FT-IR spectrum of **5a**



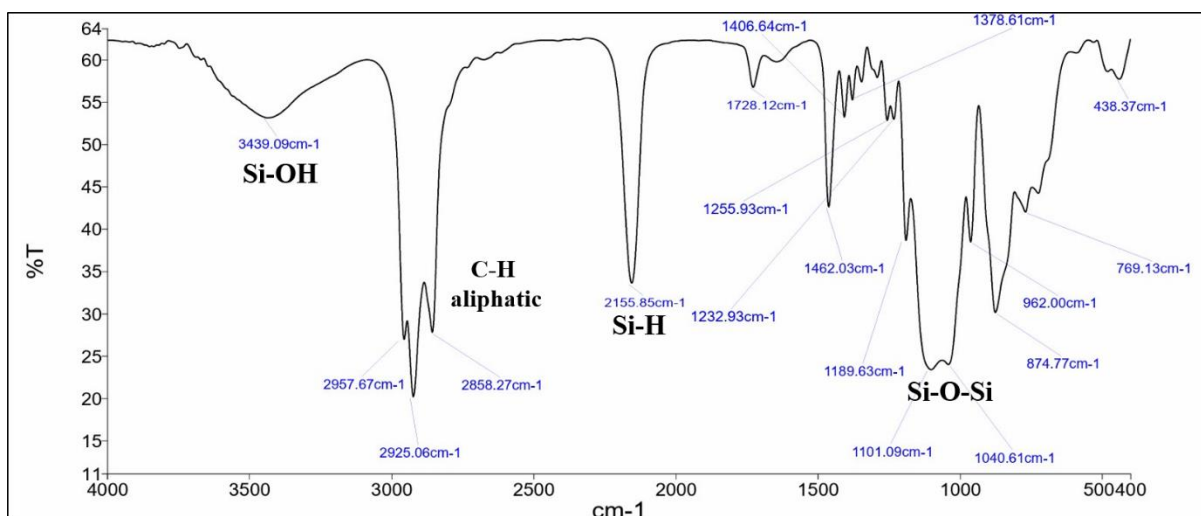

Figure S18. FT-IR spectrum of 5b

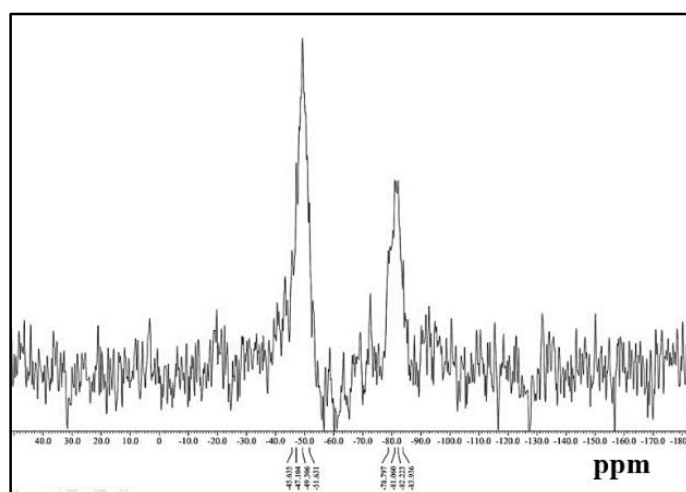

Figure S19. Solid state <sup>29</sup>Si NMR spectrum of 5a

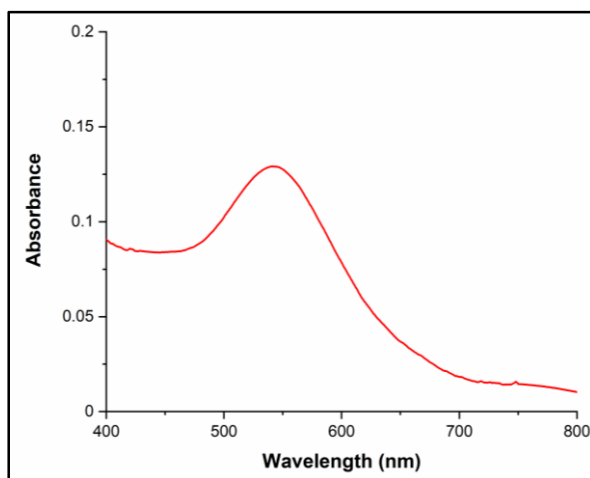

Figure S20. UV-Vis diffuse reflectance spectrum of 5a

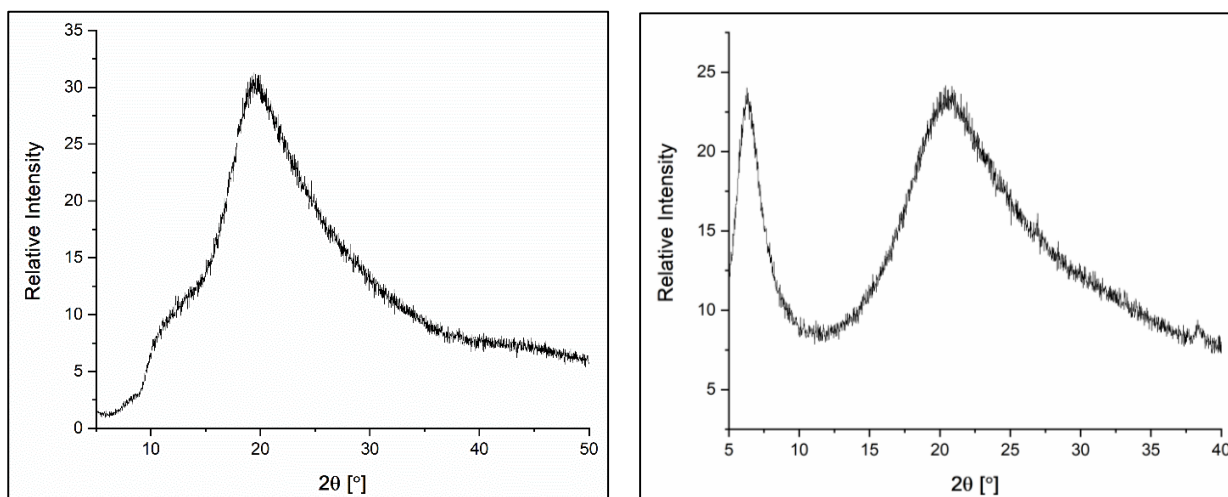

**Figure S21.** Powder X-ray diffraction pattern of **5a** (left) and **5b** (right)
